# Supplementary material for: Highly efficient deep-blue organic light-emitting diodes (OLEDs) based on hot-exciton materials with multiple triplet exciton conversion channels
Source: Royal Society of Chemistry journal article supplement (doi:10.1039/d3tc03022a), 2023-01-01
Supplement: d3tc03022a1.pdf [file d3tc03022a1.pdf]

## Supporting Information

### Highly Efficient Deep Blue Organic Light-emitting Diodes (OLEDs) Based on Hot-exciton Materials with Multiple Triplet Excitons Conversion Channels

Mizhen Sun,<sup>a</sup> Chenglin Ma,<sup>a</sup> Lizhi Chu<sup>a</sup>, Yuyu Pan,<sup>b</sup> Qikun Sun<sup>a</sup>, Wenjun Yang<sup>a</sup> and Shanfeng Xue<sup>a\*</sup>

*<sup>a</sup>Key Laboratory of Rubber-Plastics of the Ministry of Education, School of Polymer Science & Engineering, Qingdao University of Science and Technology, 53-Zhengzhou Road, Qingdao 266042, P. R. China.*

*\*Corresponding author. E-mail: sfxue@qust.edu.cn;*

*<sup>b</sup>School of Petrochemical Engineering, Shenyang University of Technology, 30 Guanghua Street, Liaoyang, 111003, P. R. China.*

#### CONTENTS

**S1 Materials and Measurements**

**S2 Synthesis and routines**

**S3 Supplementary figures**

**S4 Supplementary tables**

## **S1 Materials and Measurements**

### ***S1.1 Materials***

All raw materials involved in the synthesis process were purchased from Aldrich Chemical Co. or Energy Chemical Co., China. The organic and metallic materials for transporting layers in OLEDs fabrication were purchased from P-OLED (Shanghai) Technology CO., LTO. The other organic solvents and reagents were all commercially available analytical-grade products and used as received without further purification.

### ***S1.2 Measurements***

NMR spectra were recorded on a Mercury 500 spectrometer. MALDI-TOF-MS mass spectra were measured using an AXIMA-CFRTM plus instrument. The dates of thermal gravimetric analysis (TGA) are from Perkin-Elmer thermal analysis system with the temperature of 50-800 °C under a heating rate of 10 °C /min and the nitrogen atmosphere. The dates of Differential scanning calorimetry (DSC) are from NETZSCH (DSC-204) instrument with the temperature of 50-500 °C at a heating rate of 10 °C /min and a nitrogen flow rate of 80 mL/min. UV-vis absorption spectra were measured on a Hitachi U-4100 spectrophotometer. Fluorescence measurements were measured on a Hitachi F-4600 spectrophotometer. Cyclic voltammetry (CV) analysis of the materials was recorded on a three-electrode cell with tetra-n-butyl-ammonium hexafluorophosphate (TBAPF<sub>6</sub>) as the supporting electrolyte. Two platinum wires were used as counter electrode and reference electrode. The scan rate is 100 mV/s, and all the potentials were corrected to the ferrocene/ferrocene<sup>+</sup> (Fe/Fe<sup>+</sup>) standard under room temperature. The oxidation curve is obtained by dissolving the product and

electrolyte in dichloromethane (DCM), and the reduction curve is obtained in *N, N*-Dimethylformamide (DMF).

### ***S1.3 Theoretical calculation.***

The DFT calculations were carried out with the Gaussian 09 B.01 Package at the level of M062X/6-31+G(d,p). And Natural transition orbital (NTO) calculations were obtained on Multiwfn program. The influence of solvent environment on the optical property of DCAT, DCAO and CNAT can be understood using the Lippert-Mataga equation, which can describe the interactions between the solvent and the dipole moment of solute.

### ***S1.4 Device fabrication.***

ITO-coated glass with a sheet resistance of 15-20  $\Omega$  square<sup>-1</sup> was used as the substrate. Before device fabrication, the ITO glass substrates were cleaned with acetone, Hellmanex<sup>TM</sup> III and deionized water, dried 12 h in an oven at 120 °C, the substrates were treated by O<sub>2</sub> plasma for 7 minutes to improve the hole injection ability of ITO. Finally transferred to a vacuum deposition system with a pressure of  $< 1.6 \times 10^{-4}$  Pa. The current-voltage-brightness characteristics were measured by using a Keithley source measurement unit (Keithley 2450 and LS-160), EL spectra were measured with Flame-S (Serial Number: FLMS16791, Range:  $> 350$  nm). EQEs were calculated from the luminance, current density, and EL spectrum, all the results were measured in the forward-viewing direction without using any light out-coupling technique. According to equation following (Formula S1).

$$EQE = \frac{\pi \cdot L \cdot e}{683 \cdot I \cdot h \cdot c} \cdot \frac{\int_{380}^{780} I(\lambda) \cdot \lambda \cdot d\lambda}{\int_{380}^{780} I(\lambda) \cdot K(\lambda) \cdot d\lambda} \quad (1)$$

where  $L$  ( $\text{cd m}^{-2}$ ) is the total luminance of device,  $I$  (A) is the current flowing into the EL device,  $\lambda$  (nm) is EL wavelength,  $I(\lambda)$  is the relative EL intensity at each wavelength and obtained by measuring the EL spectrum,  $K(\lambda)$  is the Commission International de L'Eclairage chromaticity (CIE) standard photopic efficiency function,  $e$  is the charge of an electron,  $h$  is the Planck's constant,  $c$  is the velocity of light.

## S2 Synthesis and routines

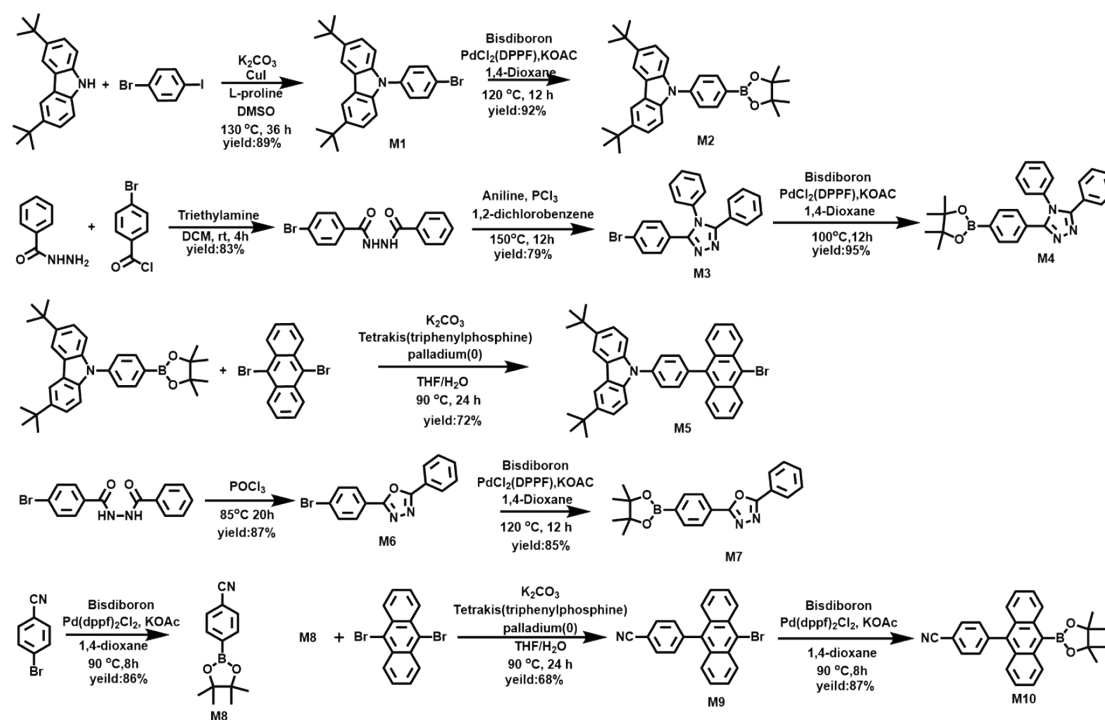

Scheme. S1 Molecular synthesis route.

### Synthesis of 9-(4-(10-bromoanthracen-9-yl)phenyl)-3,6-di-*tert*-butyl-9H-carbazole (M5):

M2 (4.0 g, 8.3 mmol), 9,10-dibromoanthracene (3.3 g, 9.8 mmol),  $\text{K}_2\text{CO}_3$  (1.2 g, 12.3 mmol),  $\text{Pd}(\text{PPh}_3)_4$  (0.28 g, 0.24 mmol), THF (50 mL) and deionized water (10 mL), the mixture was reacted at  $90^\circ\text{C}$  for 24 hours under nitrogen atmosphere. Then remove the

solvent, wash the crude product with water and dichloromethane, dry it with MgSO<sub>4</sub> and filter, then separate by column chromatography (the eluent is petroleum ether: dichloromethane 3: 1). The product M5 was obtained. (3.6 g, 72%).

**Synthesis of 2-phenyl-5-(4-(4,4,5,5-tetramethyl-1,3,2-dioxaborolan-2-yl)phenyl)-1,3,4-oxadiazole (M7):**

M6 (3 g, 9.9 mmol), Bisdiboron (3.1 g, 12.2 mmol), PdCl<sub>2</sub>(DPPF) (0.22 g, 0.3 mmol), CH<sub>3</sub>COOK (2.9 g, 29.54 mmol) and 1,4-Dioxane (30 mL), the mixture was reacted at 100 °C for 12 hours under nitrogen atmosphere, then remove the solvent, wash the crude product with water and dichloromethane, dry it with MgSO<sub>4</sub> and filter, then separate by column chromatography (the eluent is ethyl acetate: dichloromethane 1: 12). M7 was obtained (2.94 g, 85%).

**Synthesis of 4-(10-(4,4,5,5-tetramethyl-1,3,2-dioxaborolan-2-yl)anthracen-9-yl)benzotrile (M10):**

4-bromobenzotrile (3 g, 16.5 mmol), Bisdiboron (5.02 g, 19.8 mmol), PdCl<sub>2</sub>(DPPF) (0.36 g, 0.5 mmol), CH<sub>3</sub>COOK (4.85 g, 49.4 mmol) and 1,4-Dioxane (30 mL), the mixture was reacted at 100 °C for 12 hours under nitrogen atmosphere, then remove the solvent, wash the crude product with water and dichloromethane, dry it with MgSO<sub>4</sub> and filter, then separate by column chromatography (pure dichloromethane). M8 was obtained (3.24 g, 86%).

M8 (8.5 g, 37.1 mmol), 9,10-dibromoanthracene (9.78 g, 29.1 mmol), K<sub>2</sub>CO<sub>3</sub> (6.0 g, 43.4 mmol), Pd(PPh<sub>3</sub>)<sub>4</sub> (1.0 g, 0.86 mmol), THF (50 mL) and deionized water (10 mL), the mixture was reacted at 90 °C for 24 hours under nitrogen atmosphere. Then remove the solvent, wash the crude product with water and dichloromethane, dry it with MgSO<sub>4</sub> and filter, then separate by column chromatography (the eluent is petroleum ether: dichloromethane 2: 1). The product M9 was obtained. (9.0 g, 68%).

M9 (3 g, 8.3 mmol), Bisdiboron (2.55 g, 10.04 mmol), PdCl<sub>2</sub>(DPPF) (0.18 g, 0.25 mmol), CH<sub>3</sub>COOK (2.5 g, 25.47 mmol) and 1,4-Dioxane (30 mL), the mixture was reacted at 100 °C for 12 hours under nitrogen atmosphere, then remove the solvent, wash the crude product with water and dichloromethane, dry it with MgSO<sub>4</sub> and filter, then separate by column chromatography (the eluent is petroleum ether:

dichloromethane 3: 1). M10 was obtained (2.95 g, 87%).

**Synthesis of 3,6-di-*tert*-butyl-9-(4-(10-(4-(4,5-diphenyl-4*H*-1,2,4-triazol-3-yl)phenyl)anthracen-9-yl)phenyl)-9*H*-carbazole (DCAT):**

M5 (3.0 g, 4.9 mmol), M4 (2.5 g, 5.8 mmol), K<sub>2</sub>CO<sub>3</sub> (0.72 g, 7.3 mmol), Pd(PPh<sub>3</sub>)<sub>4</sub> (0.17 g, 0.14 mmol), THF (50 mL) and deionized water (10 mL), the mixture was reacted at 90 °C for 24 hours under nitrogen atmosphere. Then remove the solvent, wash the crude product with water and dichloromethane, dry it with MgSO<sub>4</sub> and filter, then separate by column chromatography (the eluent is ethyl acetate: dichloromethane 3: 1). The product DCAT was obtained. (2.7 g, 66%). <sup>1</sup>NMR (500 MHz, Chloroform-d) δ 8.21 (d, J = 1.8 Hz, 2H), 7.86 – 7.79 (m, 4H), 7.72 – 7.69 (m, 2H), 7.68 – 7.64 (m, 4H), 7.61 (dd, J = 8.6, 1.4 Hz, 2H), 7.57 – 7.49 (m, 8H), 7.48 – 7.41 (m, 3H), 7.40 – 7.31 (m, 7H), 1.50 (d, J = 1.5 Hz, 18H). <sup>13</sup>C NMR (126 MHz, Chloroform-d) δ 155.00, 154.73, 143.08, 140.60, 139.23, 132.65, 131.54, 130.11, 129.96, 129.84, 129.71, 128.85, 128.78, 128.48, 127.99, 127.01, 126.89, 126.74, 126.47, 125.37, 123.71, 123.57, 116.35, 109.39, 34.80, 32.06. MALDI-TOF MS (mass m/z): calcd for C<sub>60</sub>H<sub>50</sub>N<sub>4</sub>, 827.4035; found, 851.4114 [M+H]<sup>+</sup>. Anal. calcd for C<sub>60</sub>H<sub>50</sub>N<sub>4</sub>: C, 87.13; H, 6.09; N, 6.77. Found: C, 87.44; H, 6.20; N, 6.36.

**Synthesis of 2-(4-(10-(4-(3,6-di-*tert*-butyl-9*H*-carbazol-9-yl)phenyl)anthracen-9-yl)phenyl)-5-phenyl-1,3,4-oxadiazole (DCAO):**

M5 (3.0 g, 4.9 mmol), M7 (2.05 g, 5.9 mmol), K<sub>2</sub>CO<sub>3</sub> (0.72 g, 7.3 mmol), Pd(PPh<sub>3</sub>)<sub>4</sub> (0.17 g, 0.14 mmol), THF (50 mL) and deionized water (10 mL), the mixture was reacted at 90 °C for 24 hours under nitrogen atmosphere. Then remove the solvent, wash the crude product with water and dichloromethane, dry it with MgSO<sub>4</sub> and filter, then separate by column chromatography (the eluent is ethyl acetate: dichloromethane 3: 1). The product DCAO was obtained. (2.5 g, 67%). <sup>1</sup>H NMR (500 MHz, Chloroform-d) δ 8.46 (d, J = 8.2 Hz, 2H), 8.28 – 8.23 (m, 4H), 8.20 – 8.18 (m, 1H), 7.93 – 7.86 (m, 4H), 7.76 (ddd, J = 9.9, 7.9, 5.6 Hz, 6H), 7.66 (d, J = 8.6 Hz, 2H), 7.63 (dd, J = 5.7, 1.8 Hz, 3H), 7.60 (dd, J = 8.6, 2.0 Hz, 3H), 7.52 – 7.44 (m, 4H), 1.55 (s, 18H). <sup>13</sup>C NMR (101 MHz, Chloroform-d) δ 164.80, 164.64, 143.11, 139.24, 136.95, 132.66, 132.25, 131.86, 130.01, 129.71, 129.20, 127.16, 127.04, 127.01, 126.61, 126.53, 125.62,

125.49, 124.01, 123.73, 123.59, 116.37, 109.40, 77.23, 34.81, 32.07. MALDI-TOF MS (mass  $m/z$ ): calcd for  $C_{54}H_{45}N_3O$ , 751.3563; found, 751.3567  $[M]^+$ . Anal. calcd for  $C_{54}H_{45}N_3O$ : C, 86.25; H, 6.03; N, 5.59; O, 2.13. Found: C, 85.93; H, 6.26; N, 5.60; O, 2.21.

**Synthesis of 4-(10-(4-(4,5-diphenyl-4*H*-1,2,4-triazol-3-yl)phenyl)anthracen-9-yl)benzotrile (CNAT):**

M10 (3.0 g, 8.3 mmol), M3 (2.6 g, 6.9 mmol),  $K_2CO_3$  (1.45 g, 10.46 mmol),  $Pd(PPh_3)_4$  (0.24 g, 0.2 mmol), THF (50 mL) and deionized water (10 mL), the mixture was reacted at 90 °C for 24 hours under nitrogen atmosphere. Then remove the solvent, wash the crude product with water and dichloromethane, dry it with  $MgSO_4$  and filter, then separate by column chromatography (the eluent is ethyl acetate: dichloromethane 3: 1). The product CNAT was obtained. (3.8 g, 78%).  $^1H$  NMR (500 MHz, Chloroform- $d$ )  $\delta$  7.91 – 7.89 (m, 2H), 7.68 (d,  $J = 7.9$  Hz, 2H), 7.63 – 7.57 (m, 4H), 7.54 – 7.47 (m, 8H), 7.39 (dd,  $J = 7.5, 5.7$  Hz, 3H), 7.37 – 7.33 (m, 5H), 7.32 – 7.30 (m, 3H).  $^{13}C$  NMR (126 MHz, Chloroform- $d$ )  $\delta$  155.01, 144.35, 140.26, 135.35, 134.92, 132.32, 132.24, 131.41, 130.11, 129.86, 129.75, 129.56, 129.34, 128.83, 128.78, 128.48, 127.97, 126.86, 126.12, 125.78, 125.45, 118.86, 111.72, 77.23. MALDI-TOF MS (mass  $m/z$ ): calcd for  $C_{41}H_{26}N_4$ , 574.2157; found, 575.2236  $[M+H]^+$ . Anal. calcd for  $C_{41}H_{26}N_4$ : C, 85.69; H, 4.56; N, 9.75. Found: C, 85.80; H, 4.83; N, 9.37.

**S3 Supplementary figures**

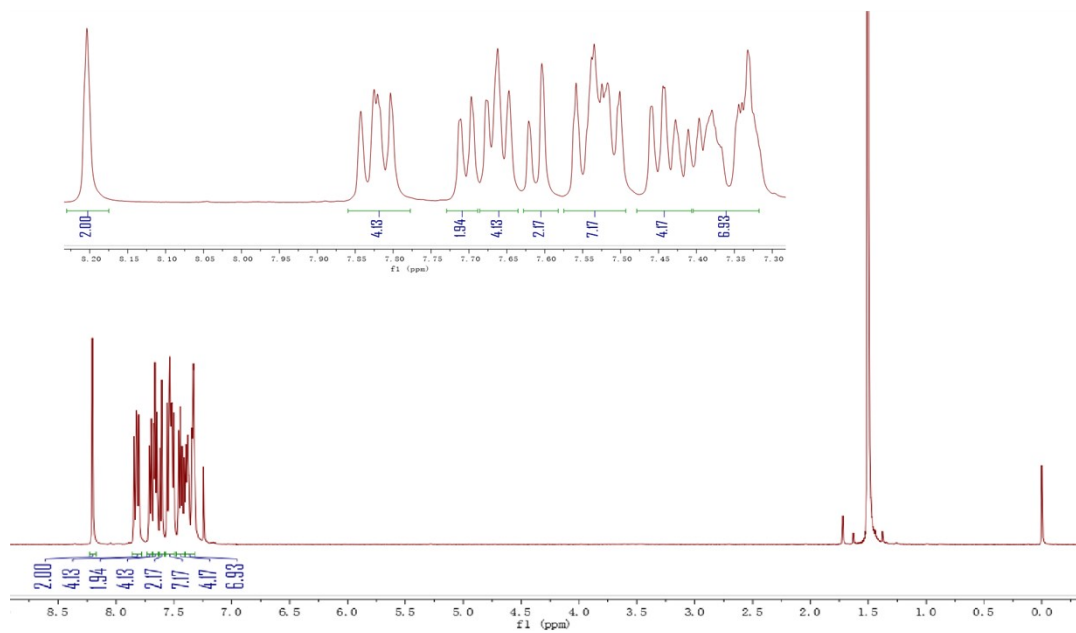

Figure. S1  $^1\text{H}$ -spectrum of DCAT.

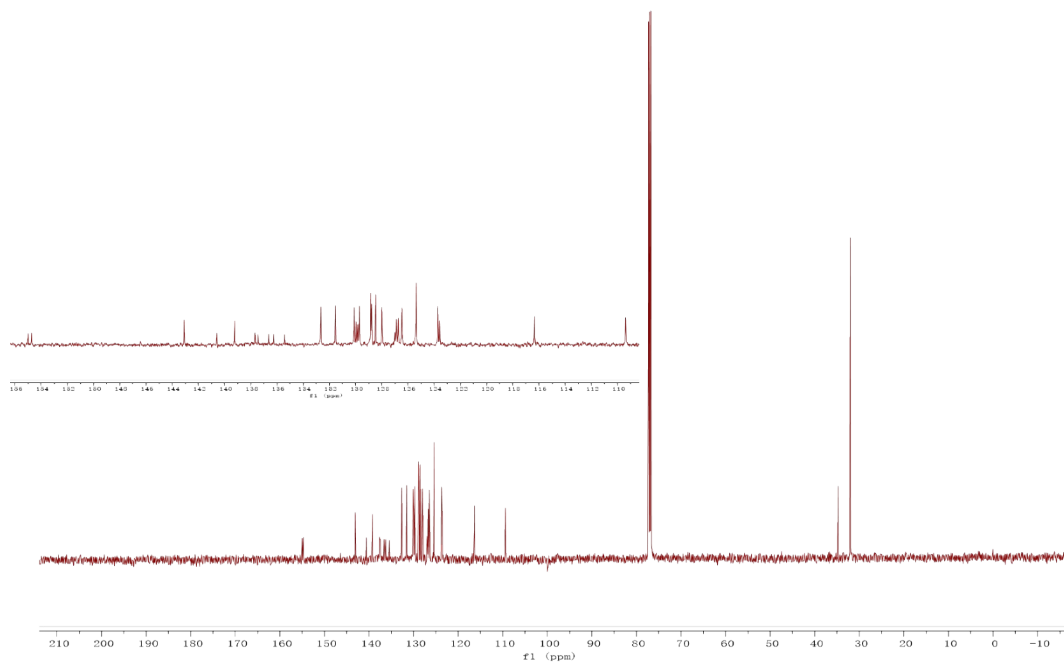

Figure. S2  $^{13}\text{C}$ -spectrum of DCAT.



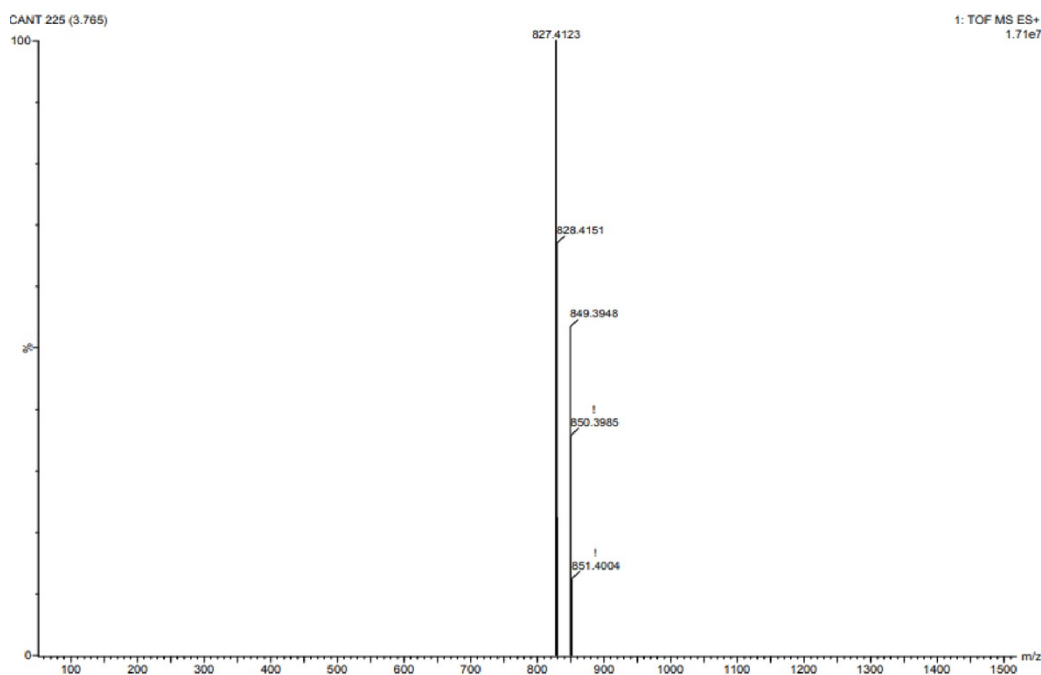

Figure. S3 Mass Spectrum  $[M+H]^+$  of DCAT

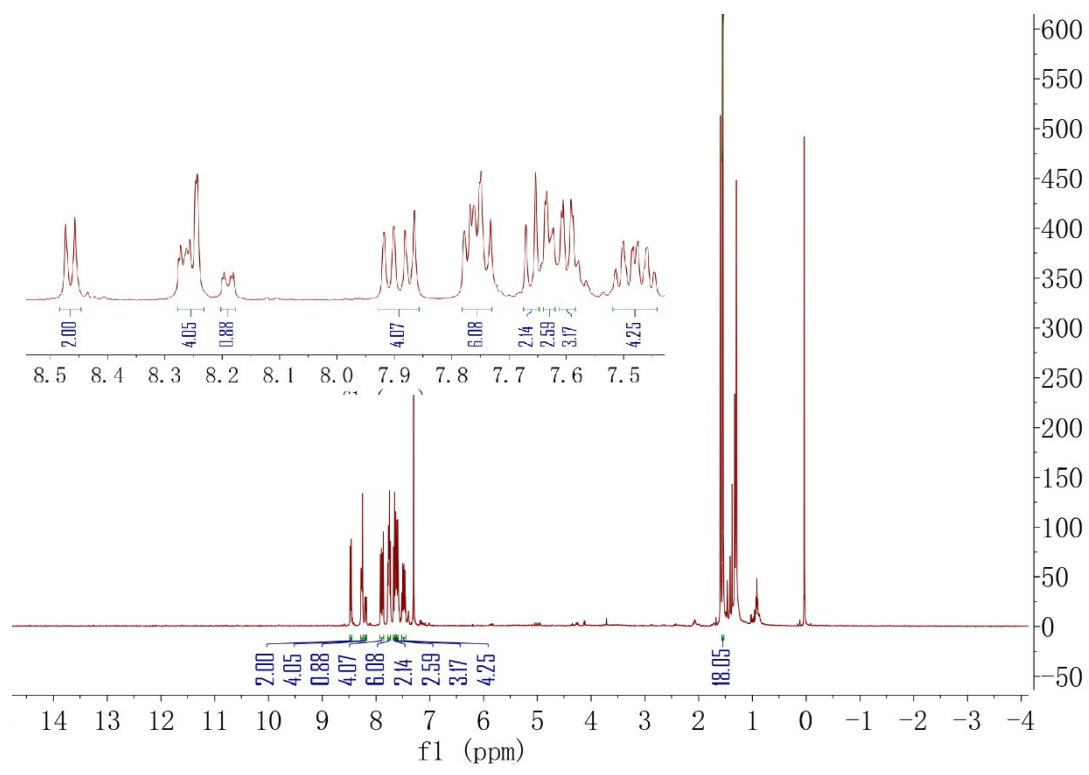

Figure. S4  $^1H$ -spectrum of DCAO.

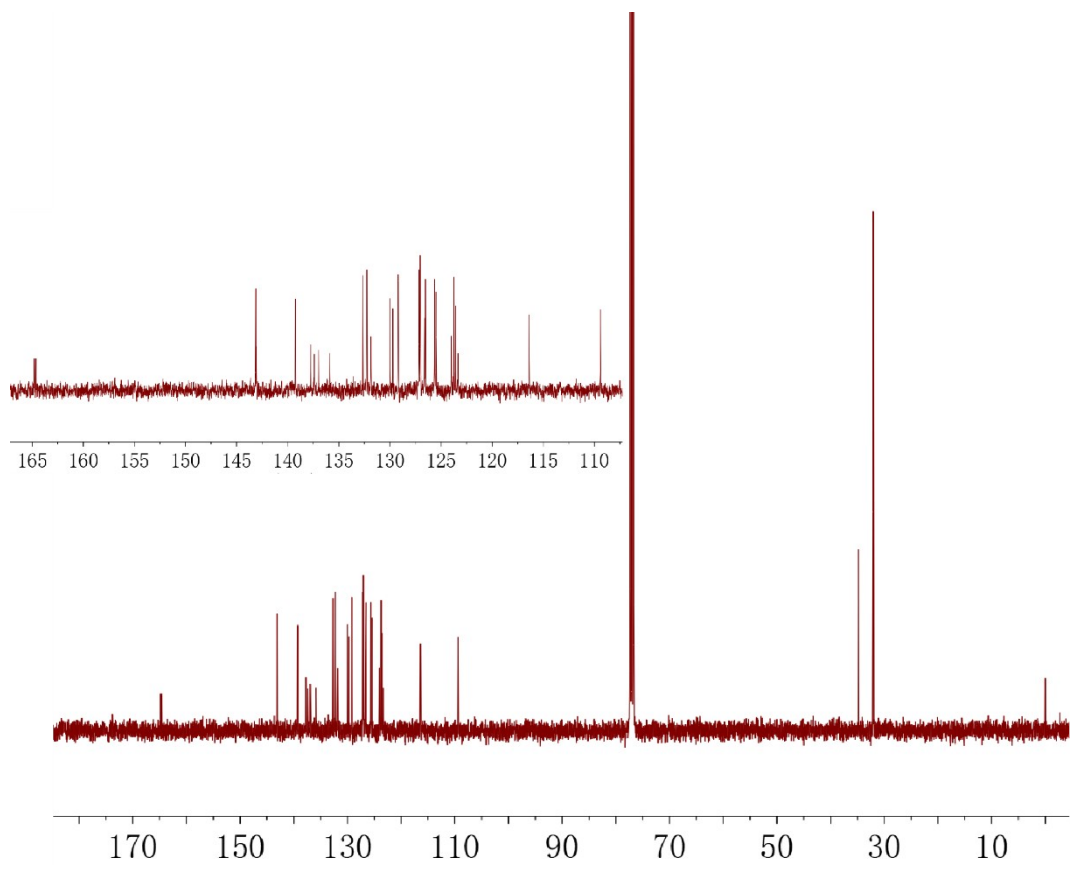

Figure. S5  $^{13}\text{C}$ -spectrum of DCAO.

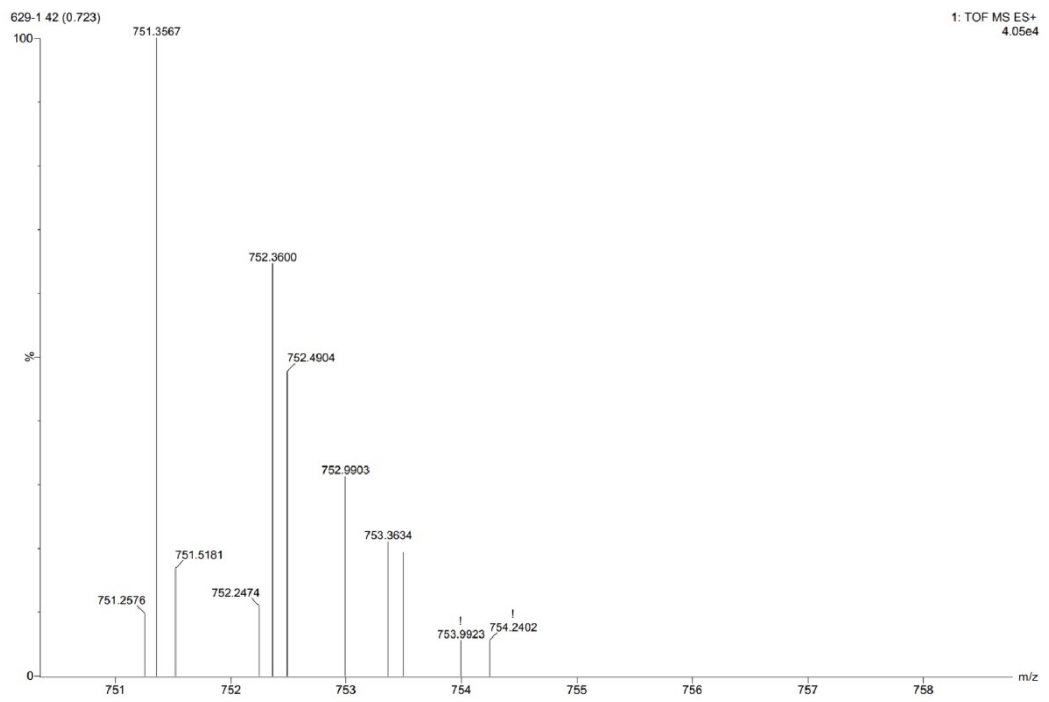

Figure. S6 Mass Spectrum  $[\text{M}]^+$  of DCAO

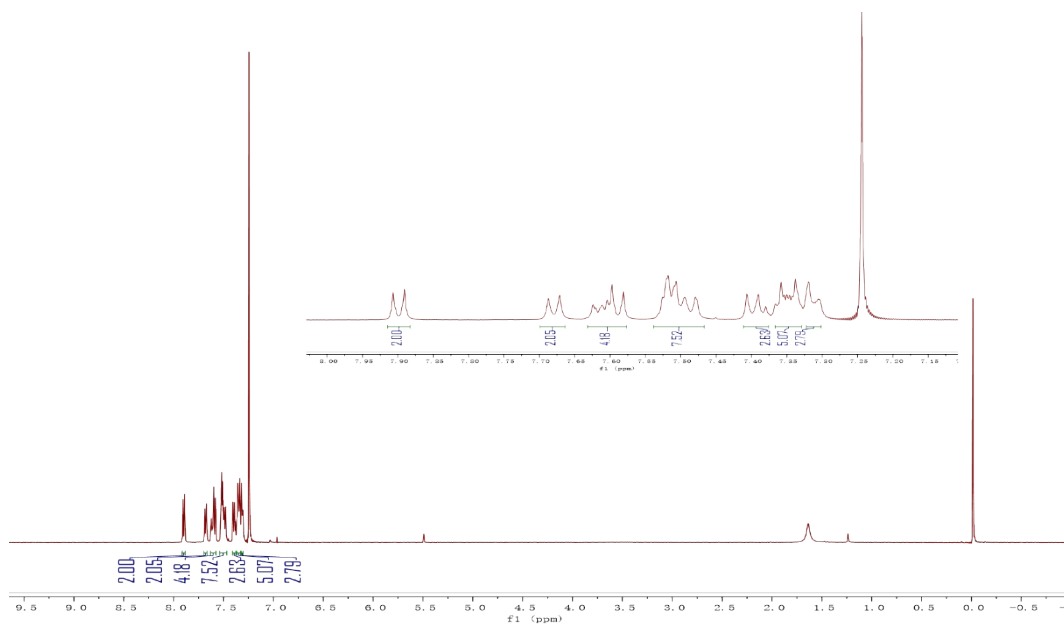

Figure. S7  $^1\text{H}$ -spectrum of CNAT.

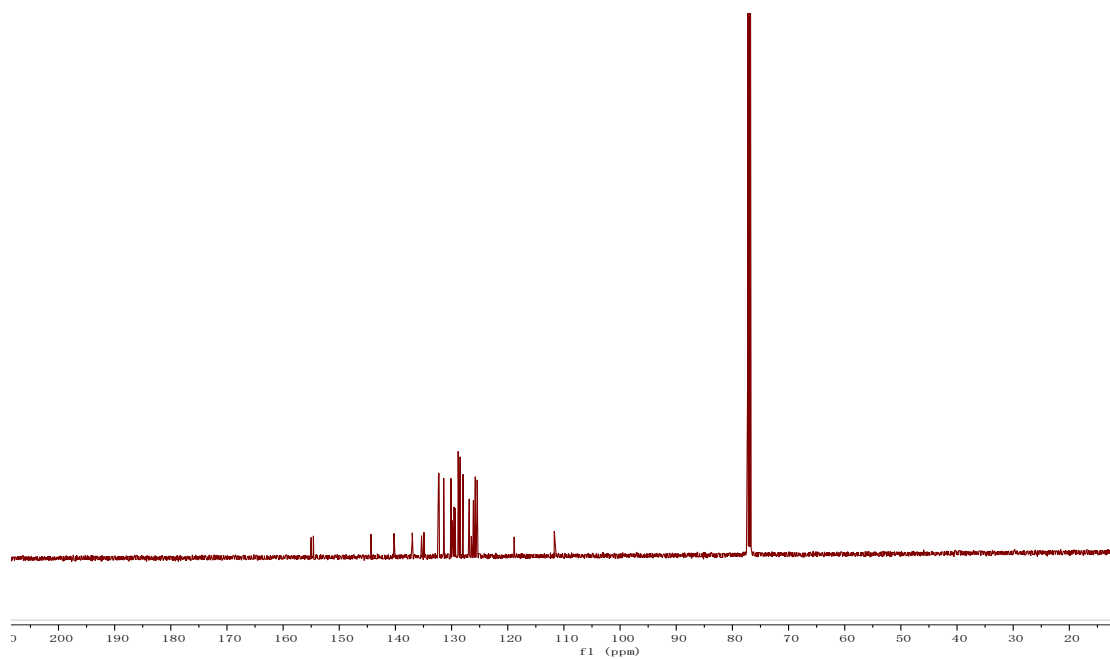

Figure. S8  $^{13}\text{C}$ -spectrum of CNAT.

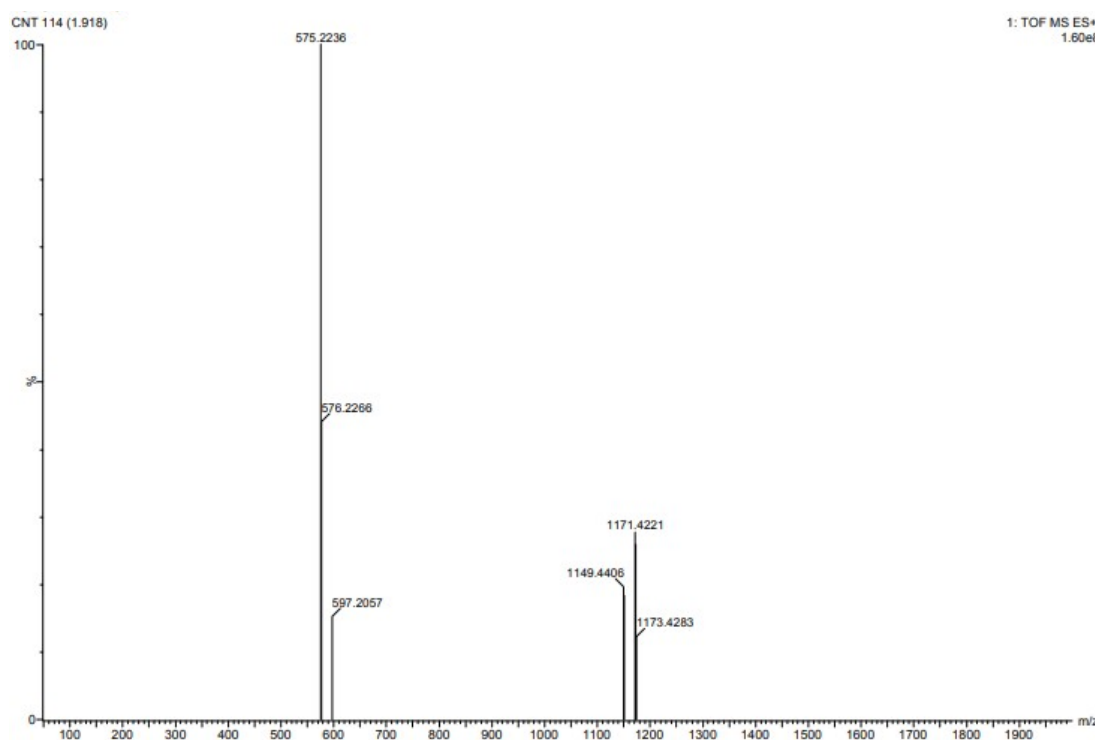

Figure. S9 Mass Spectrum  $[M+H]^+$  of CNAT

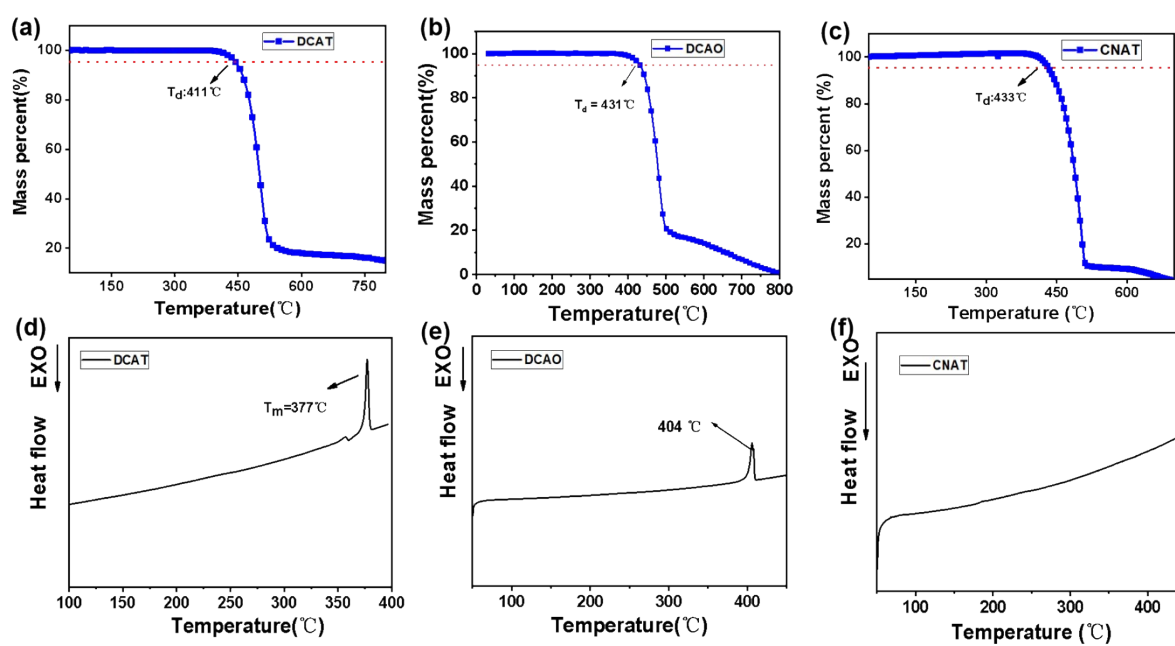

Figure. S10 Thermal properties of three molecules, TGA including (a), (b) (c), and DSC including (d), (e) (f).

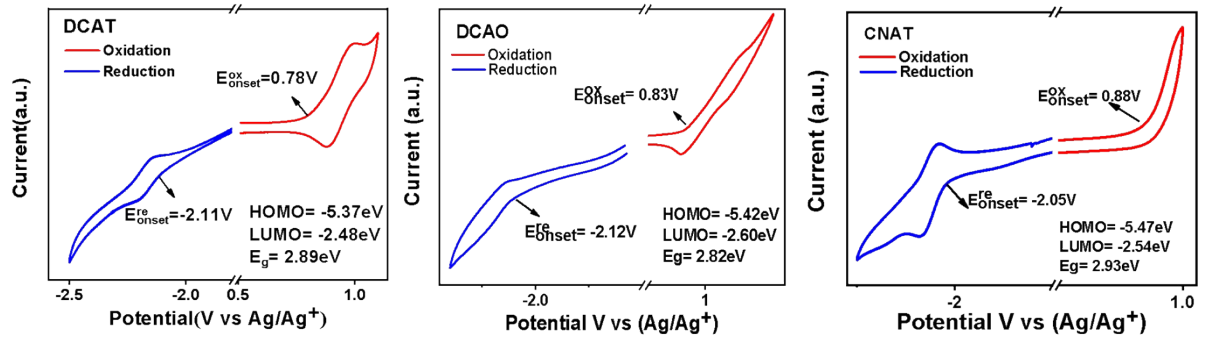

Figure. S11 The electrochemical properties of DCAT, DCAO and CNAT.

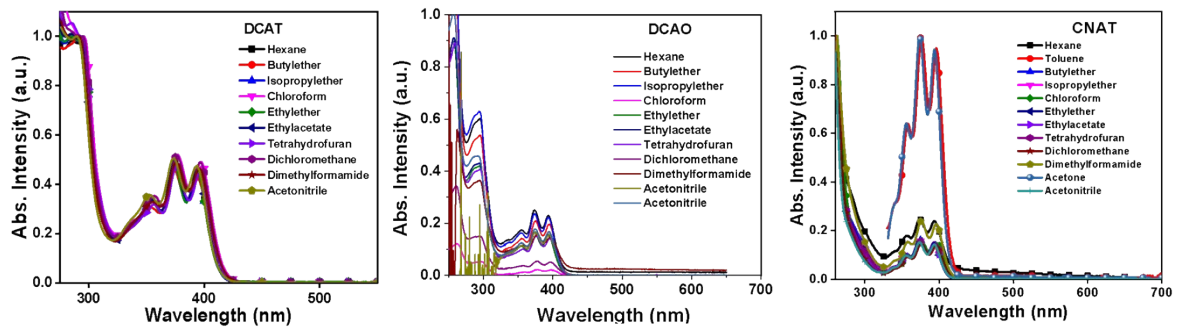

Figure. S12 The absorption spectra of DCAT, DCAO and CNAT under different solvents with different polarities.

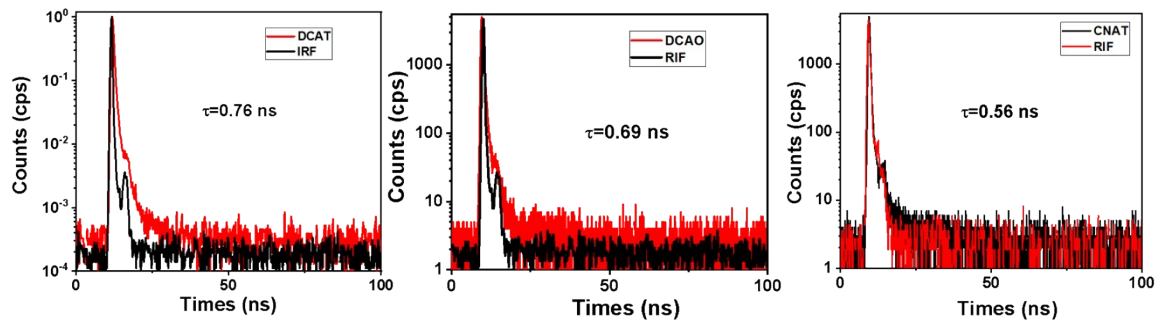

Figure. S13 Transient absorption spectrum of DCAT, DCAO and CNAT.

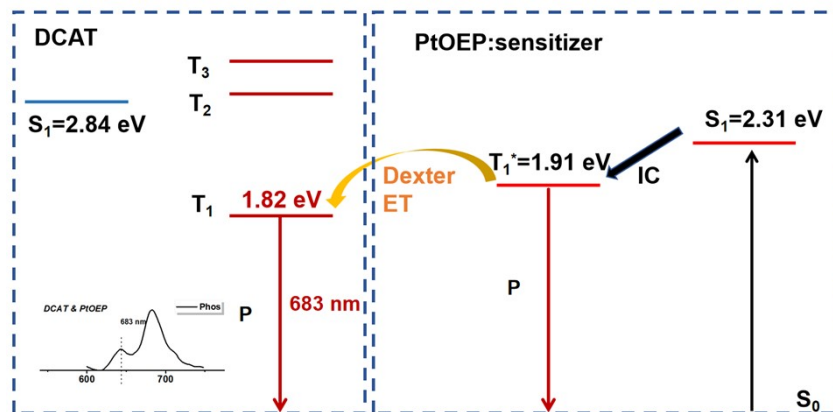

Figure. S14 Schematic of the photophysical dynamics in the PtOEP & DCAT solution. “ET” stands for energy transfer and “P” stands for phosphorescence.

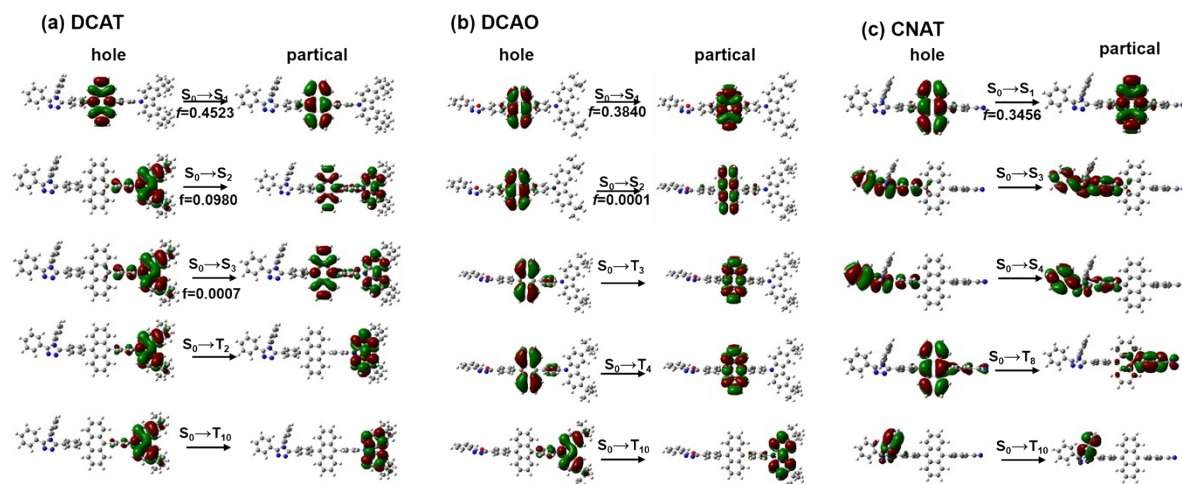

Figure. S15 Distribution of electron clouds in the natural transition orbitals of some energy levels of the three compounds that may undergo hRISC processes.

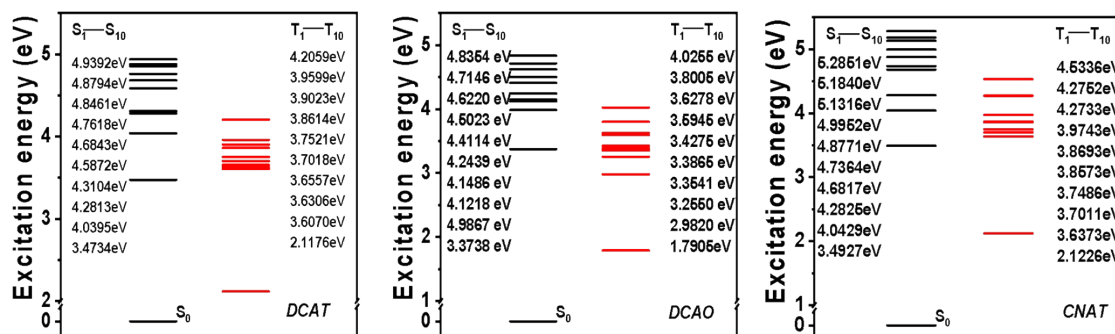

Figure. S16 Theoretical calculation of energy level distribution.

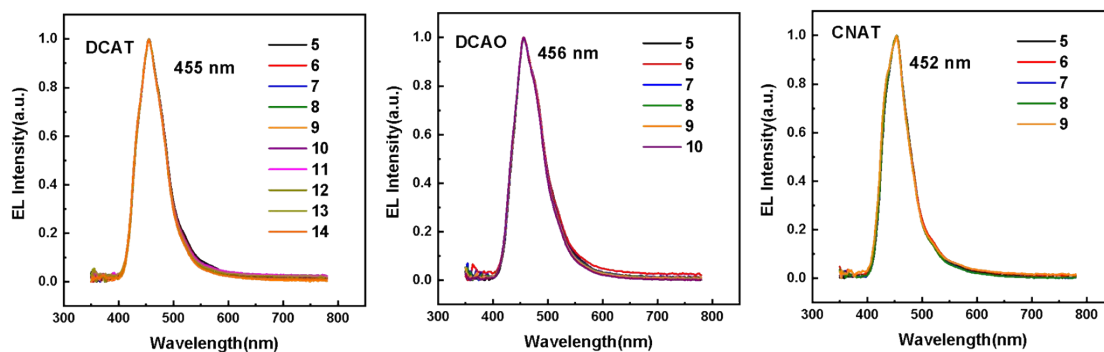

Figure. S17 Electroluminescence spectra of the three non-doped devices at different voltages.

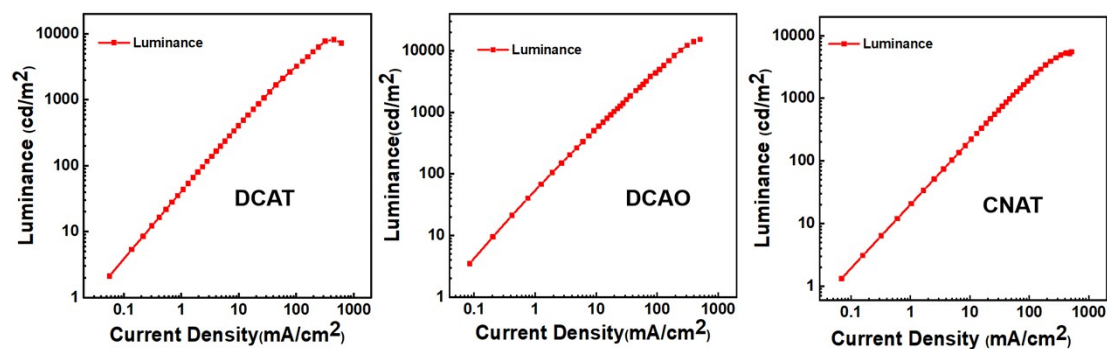

Figure S18. Luminance-current density of DCAT, DCAO and CNAT, this linear relationship can exclude TTA.

#### S4 Supplementary tables

Table S1. The absorption and emission peaks (Abs/PL) of three molecules in solvents with different polarities.

|                  | DCAT (Abs/PL)<br>[nm] | DCAO (Abs/PL)<br>[nm] | CNAT (Abs/PL)<br>[nm] |
|------------------|-----------------------|-----------------------|-----------------------|
| n-hexane         | 393/424               | 393/430               | 393/424               |
| butyl ether      | 393/427               | 394/434               | 393/425               |
| Isopropyl ether  | 393/430               | 393/433               | 392/426               |
| Trichloromethane | 397/435               | 397/444               | 393/434               |
| Ether            | 393/434               | 393/434               | 395/434               |
| ethyl acetate    | 394/430               | 393/435               | 393/429               |
| Tetrahydrofuran  | 395/437               | 395/440               | 393/432               |
| dichloromethane  | 395/439               | 395/445               | 393/430               |
| DMF              | 396/442               | 395/447               | 390/434               |

|              |         |         |         |
|--------------|---------|---------|---------|
| acetone      | 393/438 | 394/444 | 393/431 |
| acetonitrile | 394/447 | 393/446 | 390/432 |

Table S2.  $\Phi_{\text{PL}}$  under different solvents and thin films

| $\Phi_{\text{PL}}$ [%] | DCAT | DCAO | CNAT |
|------------------------|------|------|------|
| n-hexane               | 65.1 | 69.2 | 61.0 |
| Ether                  | 73.7 | 62.3 | 73.5 |
| Tetrahydrofuran        | 70.9 | 55.4 | 69.1 |
| acetonitrile           | 47.5 | 43.1 | 65.5 |
| Film                   | 47.7 | 45.5 | 62.2 |
